# Supplementary material for: Transcriptome analysis of fibroblasts from schizophrenia patients reveals differential expression of schizophrenia-related genes
Source: PubMed Central journal article supplement (PMC6971273; doi:10.1038/s41598-020-57467-z), 2020-01-20
Supplement: 41598_2020_57467_MOESM1_ESM.pdf [file 41598_2020_57467_MOESM1_ESM.pdf]

# **Transcriptome analysis of fibroblasts from schizophrenia patients reveals differential expression of schizophrenia-related genes**

Mitra Etemadikhah<sup>1</sup>, Adnan Niazi<sup>1</sup>, Lennart Wetterberg<sup>2</sup> and Lars Feuk<sup>1\*</sup>

<sup>1</sup> Department of Immunology, Genetics and Pathology, Science for Life Laboratory Uppsala, Uppsala University, Uppsala, Sweden

<sup>2</sup> Department of Clinical Neuroscience (CNS), K8, Karolinska Institute, Stockholm, Sweden

\*Corresponding author:

Lars Feuk

Department of Immunology, Genetics and Pathology

Box 815, BMC B11:4, Uppsala University

751 08 Uppsala, Sweden

Phone: +46 18 471 4827

E-mail: [Lars.Feuk@igp.uu.se](mailto:Lars.Feuk@igp.uu.se)

**Supplementary Table S1:** An overview of demographic data

| Demographics                            | Schizophrenia (n=9) | Control (n=7) | Statistics        |
|-----------------------------------------|---------------------|---------------|-------------------|
| Sex Female/Male                         | 5F:4M               | 5F:2M         | 0.89 (Chi-square) |
| Age of disease onset in years           | 19.2 ± 4.3          | -             | N/A               |
| Age at which skin biopsy has been taken | 32 ± 7.9            | 39.9 ± 20.03  | 0.36 (t-test)     |

**Supplementary Table S2: Differentially Expressed Genes (DEGs) in Fibroblasts**

| Row.names       | baseMean   | log2FoldChange | pvalue     | padj       | gene_symbol | biotype        |
|-----------------|------------|----------------|------------|------------|-------------|----------------|
| ENSG00000149289 | 1263.35509 | 0.736095003    | 7.52E-11   | 1.20E-06   | ZC3H12C     | protein_coding |
| ENSG00000146592 | 188.821104 | 2.265212252    | 1.12E-08   | 8.93E-05   | CREB5       | protein_coding |
| ENSG00000168528 | 4591.60472 | -1.758075961   | 3.39E-08   | 0.00018002 | SERINC2     | protein_coding |
| ENSG00000019991 | 343.364144 | 3.805874858    | 9.27E-07   | 0.00369518 | HGF         | protein_coding |
| ENSG00000198300 | 28.4400347 | -3.898520087   | 1.22E-06   | 0.00388696 | PEG3        | protein_coding |
| ENSG00000149596 | 2486.84723 | -1.228427868   | 2.41E-06   | 0.00641517 | JPH2        | protein_coding |
| ENSG00000095587 | 140.572923 | -1.929432049   | 4.87E-06   | 0.01109035 | TLL2        | protein_coding |
| ENSG00000173917 | 1088.30708 | -0.717016853   | 5.68E-06   | 0.01131029 | HOXB2       | protein_coding |
| ENSG00000120075 | 202.344579 | -1.531928462   | 7.91E-06   | 0.01401423 | HOXB5       | protein_coding |
| ENSG00000144659 | 1746.79882 | -0.379662502   | 1.32E-05   | 0.02063359 | SLC25A38    | protein_coding |
| ENSG00000198919 | 1020.21433 | 0.519038008    | 1.42E-05   | 0.02063359 | DZIP3       | protein_coding |
| ENSG00000105538 | 76.6113255 | -4.799819369   | 1.90E-05   | 0.02329886 | RASIP1      | protein_coding |
| ENSG00000126016 | 1069.36779 | 1.297043505    | 1.86E-05   | 0.02329886 | AMOT        | protein_coding |
| ENSG00000070182 | 400.308931 | -1.789812347   | 2.28E-05   | 0.02424519 | SPTB        | protein_coding |
| ENSG00000171368 | 20.716006  | -1.596892742   | 2.23E-05   | 0.02424519 | TPPP        | protein_coding |
| ENSG00000173253 | 27.6030636 | 3.849836806    | 2.87E-05   | 0.02847318 | DMRT2       | protein_coding |
| ENSG00000178202 | 8170.91388 | 0.508928906    | 3.04E-05   | 0.02847318 | KDELC2      | protein_coding |
| ENSG00000167371 | 274.831657 | 1.380727819    | 3.75E-05   | 0.03146678 | PRRT2       | protein_coding |
| ENSG00000259820 | 114.708105 | 0.87352013     | 3.69E-05   | 0.03146678 | AC083843.1  | lincRNA        |
| ENSG00000149212 | 1215.68296 | 1.047109946    | 5.11E-05   | 0.04075616 | SESN3       | protein_coding |
| ENSG00000120738 | 2802.99039 | 1.361000693    | 6.24E-05   | 0.04522384 | EGR1        | protein_coding |
| ENSG00000171608 | 1016.93485 | -0.78865285    | 6.23E-05   | 0.04522384 | PIK3CD      | protein_coding |
| ENSG00000144583 | 6118.03896 | -0.879725264   | 6.96E-05   | 0.04619857 | 04-Mar      | protein_coding |
| ENSG00000185742 | 1596.17422 | 1.00304696     | 6.77E-05   | 0.04619857 | C11orf87    | protein_coding |
| ENSG00000108821 | 483429.712 | -0.741685563   | 0.000104   | 0.06631578 | COL1A1      | protein_coding |
| ENSG00000115317 | 1624.48588 | -0.37347778    | 0.00010939 | 0.06706662 | HTRA2       | protein_coding |
| ENSG00000123610 | 174.388568 | 2.196452627    | 0.00011738 | 0.06929964 | TNFAIP6     | protein_coding |
| ENSG00000005020 | 1832.41146 | 0.432451092    | 0.00014143 | 0.08051659 | SKAP2       | protein_coding |

|                 |            |              |            |            |               |                |
|-----------------|------------|--------------|------------|------------|---------------|----------------|
| ENSG00000065809 | 1893.78943 | 1.242388597  | 0.000153   | 0.08130024 | FAM107B       | protein_coding |
| ENSG00000205683 | 364.09917  | 1.224383073  | 0.00014927 | 0.08130024 | DPF3          | protein_coding |
| ENSG00000101040 | 1696.89753 | 0.352230089  | 0.00016445 | 0.08300528 | ZMYND8        | protein_coding |
| ENSG00000196611 | 31558.4872 | 2.644646924  | 0.00016662 | 0.08300528 | MMP1          | protein_coding |
| ENSG00000169744 | 2666.65096 | 1.063645586  | 0.00017767 | 0.08582654 | LDB2          | protein_coding |
| ENSG00000124406 | 45.1183596 | 1.467493731  | 0.00022265 | 0.09045698 | ATP8A1        | protein_coding |
| ENSG00000130517 | 952.60076  | -1.034746439 | 0.00022543 | 0.09045698 | PGPEP1        | protein_coding |
| ENSG00000157557 | 3517.19104 | 0.785239453  | 0.00021239 | 0.09045698 | ETS2          | protein_coding |
| ENSG00000164342 | 27.6953704 | 2.336562236  | 0.0002174  | 0.09045698 | TLR3          | protein_coding |
| ENSG00000168906 | 13290.4895 | 0.502722867  | 0.00021003 | 0.09045698 | MAT2A         | protein_coding |
| ENSG00000182372 | 1364.21051 | -0.717335667 | 0.00020076 | 0.09045698 | CLN8          | protein_coding |
| ENSG00000273247 | 54.9895546 | 1.049087175  | 0.00022698 | 0.09045698 | RP11-83A24.2  | antisense      |
| ENSG00000152527 | 134.227439 | 1.79403818   | 0.00025506 | 0.09680782 | PLEKHH2       | protein_coding |
| ENSG00000179388 | 284.785384 | 2.718632158  | 0.00025257 | 0.09680782 | EGR3          | protein_coding |
| ENSG00000082153 | 12435.1883 | 0.368768949  | 0.00027359 | 0.09730222 | BZW1          | protein_coding |
| ENSG00000155980 | 77.7326412 | 1.918079817  | 0.00026413 | 0.09730222 | KIF5A         | protein_coding |
| ENSG00000198121 | 4759.81556 | 0.608206999  | 0.00027468 | 0.09730222 | LPAR1         | protein_coding |
| ENSG00000168575 | 5031.46371 | -0.800672727 | 0.0002834  | 0.09821078 | SLC20A2       | protein_coding |
| ENSG00000251281 | 50.9036573 | -3.394732976 | 0.00029033 | 0.0984708  | CTD-2066L21.2 | lincRNA        |
| ENSG00000118785 | 722.433157 | -2.62828212  | 0.00029833 | 0.09907588 | SPP1          | protein_coding |

**SupplementaryTable S3: List of Genes in Module Skyblue**

| ensid           | gene_symbol | biotype        |
|-----------------|-------------|----------------|
| ENSG00000031698 | SARS        | protein_coding |
| ENSG00000040341 | STAU2       | protein_coding |
| ENSG00000047346 | FAM214A     | protein_coding |
| ENSG00000054793 | ATP9A       | protein_coding |
| ENSG00000058729 | RIOK2       | protein_coding |
| ENSG00000059728 | MXD1        | protein_coding |
| ENSG00000070669 | ASNS        | protein_coding |
| ENSG00000071575 | TRIB2       | protein_coding |
| ENSG00000072422 | RHOBTB1     | protein_coding |
| ENSG00000076043 | REXO2       | protein_coding |
| ENSG00000077713 | SLC25A43    | protein_coding |
| ENSG00000082196 | C1QTNF3     | protein_coding |
| ENSG00000089177 | KIF16B      | protein_coding |
| ENSG00000091513 | TF          | protein_coding |
| ENSG00000097033 | SH3GLB1     | protein_coding |
| ENSG00000101290 | CDS2        | protein_coding |
| ENSG00000102053 | ZC3H12B     | protein_coding |
| ENSG00000102452 | NALCN       | protein_coding |
| ENSG00000102893 | PHKB        | protein_coding |
| ENSG00000102931 | ARL2BP      | protein_coding |
| ENSG00000103160 | HSDL1       | protein_coding |
| ENSG00000104154 | SLC30A4     | protein_coding |
| ENSG00000104490 | NCALD       | protein_coding |
| ENSG00000106688 | SLC1A1      | protein_coding |
| ENSG00000108821 | COL1A1      | protein_coding |
| ENSG00000109016 | DHRS7B      | protein_coding |
| ENSG00000110768 | GTF2H1      | protein_coding |
| ENSG00000111911 | HINT3       | protein_coding |
| ENSG00000112425 | EPM2A       | protein_coding |
| ENSG00000113163 | COL4A3BP    | protein_coding |
| ENSG00000113273 | ARSB        | protein_coding |
| ENSG00000114850 | SSR3        | protein_coding |
| ENSG00000114942 | EEF1B2      | protein_coding |
| ENSG00000115414 | FN1         | protein_coding |
| ENSG00000116138 | DNAJC16     | protein_coding |
| ENSG00000116954 | RRAGC       | protein_coding |
| ENSG00000118363 | SPCS2       | protein_coding |
| ENSG00000122550 | KLHL7       | protein_coding |
| ENSG00000123739 | PLA2G12A    | protein_coding |
| ENSG00000124215 | CDH26       | protein_coding |
| ENSG00000125633 | CCDC93      | protein_coding |
| ENSG00000126775 | ATG14       | protein_coding |
| ENSG00000127472 | PLA2G5      | protein_coding |
| ENSG00000127603 | MACF1       | protein_coding |

|                 |          |                       |
|-----------------|----------|-----------------------|
| ENSG00000129055 | ANAPC13  | protein_coding        |
| ENSG00000129493 | HEATR5A  | protein_coding        |
| ENSG00000130703 | OSBPL2   | protein_coding        |
| ENSG00000130997 | POLN     | protein_coding        |
| ENSG00000131379 | C3orf20  | protein_coding        |
| ENSG00000134375 | TIMM17A  | protein_coding        |
| ENSG00000134851 | TMEM165  | protein_coding        |
| ENSG00000135069 | PSAT1    | protein_coding        |
| ENSG00000135823 | STX6     | protein_coding        |
| ENSG00000136881 | BAAT     | protein_coding        |
| ENSG00000137942 | FNBP1L   | protein_coding        |
| ENSG00000138119 | MYOF     | protein_coding        |
| ENSG00000138623 | SEMA7A   | protein_coding        |
| ENSG00000138758 |          | 11-Sep protein_coding |
| ENSG00000139998 | RAB15    | protein_coding        |
| ENSG00000141298 | SSH2     | protein_coding        |
| ENSG00000142188 | TMEM50B  | protein_coding        |
| ENSG00000143164 | DCAF6    | protein_coding        |
| ENSG00000143199 | ADCY10   | protein_coding        |
| ENSG00000143248 | RGS5     | protein_coding        |
| ENSG00000143643 | TTC13    | protein_coding        |
| ENSG00000144366 | GULP1    | protein_coding        |
| ENSG00000145349 | CAMK2D   | protein_coding        |
| ENSG00000148444 | COMMD3   | protein_coding        |
| ENSG00000151092 | NGLY1    | protein_coding        |
| ENSG00000151388 | ADAMTS12 | protein_coding        |
| ENSG00000152785 | BMP3     | protein_coding        |
| ENSG00000156804 | FBXO32   | protein_coding        |
| ENSG00000157734 | SNX22    | protein_coding        |
| ENSG00000161217 | PCYT1A   | protein_coding        |
| ENSG00000162298 | SYVN1    | protein_coding        |
| ENSG00000162614 | NEXN     | protein_coding        |
| ENSG00000162627 | SNX7     | protein_coding        |
| ENSG00000163513 | TGFBR2   | protein_coding        |
| ENSG00000163754 | GYG1     | protein_coding        |
| ENSG00000164144 | ARFIP1   | protein_coding        |
| ENSG00000165476 | REEP3    | protein_coding        |
| ENSG00000166167 | BTRC     | protein_coding        |
| ENSG00000166579 | NDEL1    | protein_coding        |
| ENSG00000166971 | AKTIP    | protein_coding        |
| ENSG00000167110 | GOLGA2   | protein_coding        |
| ENSG00000169570 | DTWD2    | protein_coding        |
| ENSG00000171291 | ZNF439   | protein_coding        |
| ENSG00000173261 | PLAC8L1  | protein_coding        |
| ENSG00000173482 | PTPRM    | protein_coding        |
| ENSG00000176171 | BNIP3    | protein_coding        |

|                 |               |                |
|-----------------|---------------|----------------|
| ENSG00000176732 | PFN4          | protein_coding |
| ENSG00000178033 | FAM26E        | protein_coding |
| ENSG00000179889 | PDXDC1        | protein_coding |
| ENSG00000180479 | ZNF571        | protein_coding |
| ENSG00000181852 | RNF41         | protein_coding |
| ENSG00000182568 | SATB1         | protein_coding |
| ENSG00000182700 | IGIP          | protein_coding |
| ENSG00000182901 | RGS7          | protein_coding |
| ENSG00000185532 | PRKG1         | protein_coding |
| ENSG00000186567 | CEACAM19      | protein_coding |
| ENSG00000186889 | TMEM17        | protein_coding |
| ENSG00000188993 | LRRC66        | protein_coding |
| ENSG00000196502 | SULT1A1       | protein_coding |
| ENSG00000196693 | ZNF33B        | protein_coding |
| ENSG00000197149 | RP11-452G18.2 | pseudogene     |
| ENSG00000197296 | FITM2         | protein_coding |
| ENSG00000197647 | ZNF433        | protein_coding |
| ENSG00000197694 | SPTAN1        | protein_coding |
| ENSG00000197702 | PARVA         | protein_coding |
| ENSG00000197826 | C4orf22       | protein_coding |
| ENSG00000197885 | NKIRAS1       | protein_coding |
| ENSG00000197894 | ADH5          | protein_coding |
| ENSG00000198001 | IRAK4         | protein_coding |
| ENSG00000198105 | ZNF248        | protein_coding |
| ENSG00000198429 | ZNF69         | protein_coding |
| ENSG00000199266 | SNORA60       | snoRNA         |
| ENSG00000203876 | RP11-451M19.3 | protein_coding |
| ENSG00000204177 | BMS1P1        | pseudogene     |
| ENSG00000213626 | LBH           | protein_coding |
| ENSG00000213976 | CTD-2561J22.2 | pseudogene     |
| ENSG00000213996 | TM6SF2        | protein_coding |
| ENSG00000214113 | LYRM4         | protein_coding |
| ENSG00000214269 | LGMNP1        | pseudogene     |
| ENSG00000214366 | RP11-138H14.1 | pseudogene     |
| ENSG00000215105 | TTC3P1        | pseudogene     |
| ENSG00000219986 | BTF3P7        | pseudogene     |
| ENSG00000220793 | RPL21P119     | pseudogene     |
| ENSG00000221051 | AC118344.1    | miRNA          |
| ENSG00000221930 | FAM45B        | pseudogene     |
| ENSG00000224597 | PTCHD3P1      | antisense      |
| ENSG00000225241 | RP11-640M9.2  | pseudogene     |
| ENSG00000225975 | AC074138.3    | lincRNA        |
| ENSG00000226381 | RP11-119F19.2 | antisense      |
| ENSG00000228399 | RP4-575N6.2   | pseudogene     |
| ENSG00000228998 | RP11-697E2.7  | pseudogene     |
| ENSG00000230069 | LRRC37A15P    | pseudogene     |

|                 |                |                      |
|-----------------|----------------|----------------------|
| ENSG00000230204 | FTH1P5         | pseudogene           |
| ENSG00000230658 | KLHL7-AS1      | lincRNA              |
| ENSG00000230701 | FBXW4P1        | pseudogene           |
| ENSG00000231007 | CDC20P1        | pseudogene           |
| ENSG00000232224 | LINC00202-1    | lincRNA              |
| ENSG00000232273 | FTH1P1         | pseudogene           |
| ENSG00000233225 | AC004987.9     | pseudogene           |
| ENSG00000234933 | CDC42P1        | pseudogene           |
| ENSG00000234981 | RP11-534L20.4  | pseudogene           |
| ENSG00000235174 | RPL39P3        | pseudogene           |
| ENSG00000235513 | RP4-756G23.5   | antisense            |
| ENSG00000239521 | GATS           | pseudogene           |
| ENSG00000240225 | ZNF542         | pseudogene           |
| ENSG00000240854 | RP11-64K7.1    | pseudogene           |
| ENSG00000240857 | RDH14          | protein_coding       |
| ENSG00000241962 | C2orf15        | protein_coding       |
| ENSG00000242095 | RN7SL113P      | misc_RNA             |
| ENSG00000244567 | AC096772.6     | lincRNA              |
| ENSG00000246263 | KB-431C1.4     | antisense            |
| ENSG00000250067 | YJEFN3         | protein_coding       |
| ENSG00000251396 | RP11-163N6.2   | lincRNA              |
| ENSG00000253797 | UTP14C         | protein_coding       |
| ENSG00000254272 | RP11-382J24.2  | pseudogene           |
| ENSG00000254363 | CTB-131B5.5    | processed_transcript |
| ENSG00000255633 | MTRNR2L9       | protein_coding       |
| ENSG00000260787 | RP11-797A18.4  | lincRNA              |
| ENSG00000261101 | RP4-545K15.5   | sense_overlapping    |
| ENSG00000267213 | AC007773.2     | antisense            |
| ENSG00000267242 | AC069278.4     | lincRNA              |
| ENSG00000268816 | CTD-3093M3.1   | lincRNA              |
| ENSG00000268894 | PLCE1-AS1      | antisense            |
| ENSG00000268913 | AC026806.2     | lincRNA              |
| ENSG00000271043 | MTRNR2L2       | protein_coding       |
| ENSG00000271452 | RP11-342K6.2   | sense_intronic       |
| ENSG00000271553 | RP11-274B21.10 | lincRNA              |
| ENSG00000272091 | RP4-758J24.5   | lincRNA              |
| ENSG00000272452 | RP11-391M1.4   | lincRNA              |
| ENSG00000272551 | RP11-324L17.1  | lincRNA              |
| ENSG00000272732 | RP5-1159O4.2   | lincRNA              |
| ENSG00000272947 | RP11-71H17.9   | lincRNA              |



### List of Genes in Module Floralwhite

| ensid           | gene_symbol  | biotype        |
|-----------------|--------------|----------------|
| ENSG00000067606 | PRKCZ        | protein_coding |
| ENSG00000068793 | CYFIP1       | protein_coding |
| ENSG00000076344 | RGS11        | protein_coding |
| ENSG00000081177 | EXD2         | protein_coding |
| ENSG00000106479 | ZNF862       | protein_coding |
| ENSG00000106976 | DNM1         | protein_coding |
| ENSG00000107185 | RGP1         | protein_coding |
| ENSG00000107960 | OBFC1        | protein_coding |
| ENSG00000110025 | SNX15        | protein_coding |
| ENSG00000112367 | FIG4         | protein_coding |
| ENSG00000112972 | HMGCS1       | protein_coding |
| ENSG00000113161 | HMGCR        | protein_coding |
| ENSG00000116106 | EPHA4        | protein_coding |
| ENSG00000124523 | SIRT5        | protein_coding |
| ENSG00000128829 | EIF2AK4      | protein_coding |
| ENSG00000131779 | PEX11B       | protein_coding |
| ENSG00000134897 | BIVM         | protein_coding |
| ENSG00000134899 | ERCC5        | protein_coding |
| ENSG00000135622 | SEMA4F       | protein_coding |
| ENSG00000135919 | SERPINE2     | protein_coding |
| ENSG00000136854 | STXBP1       | protein_coding |
| ENSG00000137177 | KIF13A       | protein_coding |
| ENSG00000142583 | SLC2A5       | protein_coding |
| ENSG00000144815 | NXPE3        | protein_coding |
| ENSG00000147099 | HDAC8        | protein_coding |
| ENSG00000147174 | ACRC         | protein_coding |
| ENSG00000151338 | MIPOL1       | protein_coding |
| ENSG00000151694 | ADAM17       | protein_coding |
| ENSG00000154917 | RAB6B        | protein_coding |
| ENSG00000158406 | HIST1H4H     | protein_coding |
| ENSG00000158445 | KCNB1        | protein_coding |
| ENSG00000163644 | PPM1K        | protein_coding |
| ENSG00000164188 | RANBP3L      | protein_coding |
| ENSG00000166323 | C11orf65     | protein_coding |
| ENSG00000167414 | GNG8         | protein_coding |
| ENSG00000177599 | ZNF491       | protein_coding |
| ENSG00000178386 | ZNF223       | protein_coding |
| ENSG00000180867 | PDIA3P1      | pseudogene     |
| ENSG00000181227 | RP4-682C21.2 | pseudogene     |
| ENSG00000184277 | TM2D3        | protein_coding |
| ENSG00000184530 | C6orf58      | protein_coding |
| ENSG00000184678 | HIST2H2BE    | protein_coding |
| ENSG00000186026 | ZNF284       | protein_coding |
| ENSG00000187372 | PCDHB13      | protein_coding |
| ENSG00000196975 | ANXA4        | protein_coding |
| ENSG00000197050 | ZNF420       | protein_coding |

|                 |               |                      |
|-----------------|---------------|----------------------|
| ENSG00000198945 | L3MBTL3       | protein_coding       |
| ENSG00000200090 | Y_RNA         | misc_RNA             |
| ENSG00000204272 | RP11-622K12.1 | processed_transcript |
| ENSG00000206052 | DOK6          | protein_coding       |
| ENSG00000213139 | CRYGS         | protein_coding       |
| ENSG00000215504 | AP000974.1    | protein_coding       |
| ENSG00000221866 | PLXNA4        | protein_coding       |
| ENSG00000225334 | RP11-449J1.1  | antisense            |
| ENSG00000225830 | ERCC6         | protein_coding       |
| ENSG00000226549 | SCDP1         | pseudogene           |
| ENSG00000228121 | PHBP3         | pseudogene           |
| ENSG00000228938 | SNRPD2P1      | pseudogene           |
| ENSG00000230177 | RP5-1112D6.4  | antisense            |
| ENSG00000230606 | AC159540.1    | lincRNA              |
| ENSG00000230665 | PRKRIRP1      | pseudogene           |
| ENSG00000234817 | RP3-400B16.1  | lincRNA              |
| ENSG00000235106 | LINC00094     | antisense            |
| ENSG00000236349 | SUCLG2P2      | pseudogene           |
| ENSG00000237133 | AC020594.5    | antisense            |
| ENSG00000242159 | ABCF2P1       | pseudogene           |
| ENSG00000242173 | ARHGDIG       | protein_coding       |
| ENSG00000243927 | MRPS6         | protein_coding       |
| ENSG00000244701 | RP5-894A10.2  | antisense            |
| ENSG00000250878 | METTL21EP     | pseudogene           |
| ENSG00000257151 | PWAR6         | lincRNA              |
| ENSG00000257594 | GALNT4        | protein_coding       |
| ENSG00000261087 | KB-1460A1.5   | lincRNA              |
| ENSG00000263002 | ZNF234        | protein_coding       |
| ENSG00000267370 | CTD-2623N2.3  | pseudogene           |
| ENSG00000269292 | CTB-12A17.3   | antisense            |
| ENSG00000269946 | RP11-2B6.3    | lincRNA              |
| ENSG00000271270 | TMCC1-AS1     | antisense            |
| ENSG00000273243 | CTA-217C2.2   | lincRNA              |

### List of Genes in Module Lightcyan

| ensid           | gene_symbol | biotype        |
|-----------------|-------------|----------------|
| ENSG00000001617 | SEMA3F      | protein_coding |
| ENSG00000002746 | HECW1       | protein_coding |
| ENSG00000007237 | GAS7        | protein_coding |
| ENSG00000011275 | RNF216      | protein_coding |
| ENSG00000022567 | SLC45A4     | protein_coding |
| ENSG00000042286 | AIFM2       | protein_coding |
| ENSG00000046647 | GEMIN8      | protein_coding |
| ENSG00000047578 | KIAA0556    | protein_coding |
| ENSG00000051620 | HEBP2       | protein_coding |
| ENSG00000060656 | PTPRU       | protein_coding |
| ENSG00000065989 | PDE4A       | protein_coding |
| ENSG00000075240 | GRAMD4      | protein_coding |
| ENSG00000087157 | PGS1        | protein_coding |
| ENSG00000088543 | C3orf18     | protein_coding |
| ENSG00000089163 | SIRT4       | protein_coding |
| ENSG00000089505 | CMTM1       | protein_coding |
| ENSG00000091986 | CCDC80      | protein_coding |
| ENSG00000095321 | CRAT        | protein_coding |
| ENSG00000099377 | HSD3B7      | protein_coding |
| ENSG00000099910 | KLHL22      | protein_coding |
| ENSG00000099953 | MMP11       | protein_coding |
| ENSG00000100246 | DNAL4       | protein_coding |
| ENSG00000100316 | RPL3        | protein_coding |
| ENSG00000100577 | GSTZ1       | protein_coding |
| ENSG00000102032 | RENBP       | protein_coding |
| ENSG00000102981 | PARD6A      | protein_coding |
| ENSG00000102984 | ZNF821      | protein_coding |
| ENSG00000103091 | WDR59       | protein_coding |
| ENSG00000103264 | FBXO31      | protein_coding |
| ENSG00000103343 | ZNF174      | protein_coding |
| ENSG00000103742 | IGDCC4      | protein_coding |
| ENSG00000104365 | IKKBK       | protein_coding |
| ENSG00000105204 | DYRK1B      | protein_coding |
| ENSG00000105281 | SLC1A5      | protein_coding |
| ENSG00000105327 | BBC3        | protein_coding |
| ENSG00000106404 | CLDN15      | protein_coding |
| ENSG00000106624 | AEBP1       | protein_coding |
| ENSG00000106948 | AKNA        | protein_coding |
| ENSG00000107819 | SFXN3       | protein_coding |
| ENSG00000113296 | THBS4       | protein_coding |
| ENSG00000114626 | ABTB1       | protein_coding |
| ENSG00000114841 | DNAH1       | protein_coding |
| ENSG00000116213 | WRAP73      | protein_coding |
| ENSG00000118971 | CCND2       | protein_coding |
| ENSG00000119943 | PYROXD2     | protein_coding |
| ENSG00000121753 | BAI2        | protein_coding |

|                 |           |                |
|-----------------|-----------|----------------|
| ENSG00000122515 | ZMIZ2     | protein_coding |
| ENSG00000126882 | FAM78A    | protein_coding |
| ENSG00000127364 | TAS2R4    | protein_coding |
| ENSG00000127366 | TAS2R5    | protein_coding |
| ENSG00000127507 | EMR2      | protein_coding |
| ENSG00000129933 | MAU2      | protein_coding |
| ENSG00000130164 | LDLR      | protein_coding |
| ENSG00000130649 | CYP2E1    | protein_coding |
| ENSG00000131043 | AAR2      | protein_coding |
| ENSG00000131797 | CLUHP3    | pseudogene     |
| ENSG00000132376 | INPP5K    | protein_coding |
| ENSG00000132405 | TBC1D14   | protein_coding |
| ENSG00000132510 | KDM6B     | protein_coding |
| ENSG00000132613 | MTSS1L    | protein_coding |
| ENSG00000132694 | ARHGEF11  | protein_coding |
| ENSG00000132801 | ZSWIM3    | protein_coding |
| ENSG00000132881 | RSG1      | protein_coding |
| ENSG00000133247 | SUV420H2  | protein_coding |
| ENSG00000133619 | KRBA1     | protein_coding |
| ENSG00000133943 | C14orf159 | protein_coding |
| ENSG00000134574 | DDB2      | protein_coding |
| ENSG00000135148 | TRAFD1    | protein_coding |
| ENSG00000135596 | MICAL1    | protein_coding |
| ENSG00000135709 | KIAA0513  | protein_coding |
| ENSG00000135736 | CCDC102A  | protein_coding |
| ENSG00000136059 | VILL      | protein_coding |
| ENSG00000136732 | GYPC      | protein_coding |
| ENSG00000138829 | FBN2      | protein_coding |
| ENSG00000138942 | RNF185    | protein_coding |
| ENSG00000139200 | PIANP     | protein_coding |
| ENSG00000139428 | MMAB      | protein_coding |
| ENSG00000139974 | SLC38A6   | protein_coding |
| ENSG00000140044 | JDP2      | protein_coding |
| ENSG00000140459 | CYP11A1   | protein_coding |
| ENSG00000140931 | CMTM3     | protein_coding |
| ENSG00000141837 | CACNA1A   | protein_coding |
| ENSG00000141934 | PPAP2C    | protein_coding |
| ENSG00000143258 | USP21     | protein_coding |
| ENSG00000143353 | LYPLAL1   | protein_coding |
| ENSG00000143847 | PPFIA4    | protein_coding |
| ENSG00000143867 | OSR1      | protein_coding |
| ENSG00000144214 | LYG1      | protein_coding |
| ENSG00000144567 | FAM134A   | protein_coding |
| ENSG00000145692 | BHMT      | protein_coding |
| ENSG00000145916 | RMND5B    | protein_coding |
| ENSG00000145919 | BOD1      | protein_coding |
| ENSG00000145949 | MYLK4     | protein_coding |
| ENSG00000145982 | FARS2     | protein_coding |

|                 |          |                |
|-----------------|----------|----------------|
| ENSG00000146733 | PSPH     | protein_coding |
| ENSG00000147403 | RPL10    | protein_coding |
| ENSG00000148356 | LRSAM1   | protein_coding |
| ENSG00000148399 | DPH7     | protein_coding |
| ENSG00000148541 | FAM13C   | protein_coding |
| ENSG00000149257 | SERPINH1 | protein_coding |
| ENSG00000149273 | RPS3     | protein_coding |
| ENSG00000150594 | ADRA2A   | protein_coding |
| ENSG00000151468 | CCDC3    | protein_coding |
| ENSG00000151572 | ANO4     | protein_coding |
| ENSG00000151846 | PABPC3   | protein_coding |
| ENSG00000152475 | ZNF837   | protein_coding |
| ENSG00000152804 | HHEX     | protein_coding |
| ENSG00000153786 | ZDHHC7   | protein_coding |
| ENSG00000153902 | LGI4     | protein_coding |
| ENSG00000154240 | CEP112   | protein_coding |
| ENSG00000154767 | XPC      | protein_coding |
| ENSG00000155511 | GRIA1    | protein_coding |
| ENSG00000156345 | CDK20    | protein_coding |
| ENSG00000157613 | CREB3L1  | protein_coding |
| ENSG00000157823 | AP3S2    | protein_coding |
| ENSG00000160172 | FAM86C2P | pseudogene     |
| ENSG00000160216 | AGPAT3   | protein_coding |
| ENSG00000160271 | RALGDS   | protein_coding |
| ENSG00000161243 | FBXO27   | protein_coding |
| ENSG00000161277 | THAP8    | protein_coding |
| ENSG00000161642 | ZNF385A  | protein_coding |
| ENSG00000162191 | UBXN1    | protein_coding |
| ENSG00000162396 | PARS2    | protein_coding |
| ENSG00000162981 | FAM84A   | protein_coding |
| ENSG00000163472 | TMEM79   | protein_coding |
| ENSG00000164627 | KIF6     | protein_coding |
| ENSG00000164638 | SLC29A4  | protein_coding |
| ENSG00000164898 | C7orf55  | protein_coding |
| ENSG00000165949 | IFI27    | protein_coding |
| ENSG00000166123 | GPT2     | protein_coding |
| ENSG00000166169 | POLL     | protein_coding |
| ENSG00000166289 | PLEKHF1  | protein_coding |
| ENSG00000167291 | TBC1D16  | protein_coding |
| ENSG00000167522 | ANKRD11  | protein_coding |
| ENSG00000167566 | NCKAP5L  | protein_coding |
| ENSG00000167716 | WDR81    | protein_coding |
| ENSG00000167968 | DNASE1L2 | protein_coding |
| ENSG00000167969 | ECI1     | protein_coding |
| ENSG00000167972 | ABCA3    | protein_coding |
| ENSG00000168096 | ANKS3    | protein_coding |
| ENSG00000168672 | FAM84B   | protein_coding |
| ENSG00000168904 | LRRC28   | protein_coding |

|                 |               |                |
|-----------------|---------------|----------------|
| ENSG00000171703 | TCEA2         | protein_coding |
| ENSG00000172053 | QARS          | protein_coding |
| ENSG00000172273 | HINFP         | protein_coding |
| ENSG00000172350 | ABCG4         | protein_coding |
| ENSG00000172530 | BANP          | protein_coding |
| ENSG00000172602 | RND1          | protein_coding |
| ENSG00000172935 | MRGPRF        | protein_coding |
| ENSG00000173548 | SNX33         | protein_coding |
| ENSG00000174137 | FAM53A        | protein_coding |
| ENSG00000174748 | RPL15         | protein_coding |
| ENSG00000175048 | ZDHHC14       | protein_coding |
| ENSG00000175764 | TTLL11        | protein_coding |
| ENSG00000175886 | RPL7AP66      | pseudogene     |
| ENSG00000177030 | DEAF1         | protein_coding |
| ENSG00000177045 | SIX5          | protein_coding |
| ENSG00000177692 | DNAJC28       | protein_coding |
| ENSG00000178078 | STAP2         | protein_coding |
| ENSG00000178301 | AQP11         | protein_coding |
| ENSG00000178623 | GPR35         | protein_coding |
| ENSG00000179406 | LINC00174     | lincRNA        |
| ENSG00000179743 | RP11-169K16.9 | antisense      |
| ENSG00000181035 | SLC25A42      | protein_coding |
| ENSG00000181097 | RP11-429J17.2 | antisense      |
| ENSG00000181481 | RNF135        | protein_coding |
| ENSG00000181982 | CCDC149       | protein_coding |
| ENSG00000182272 | B4GALNT4      | protein_coding |
| ENSG00000183111 | ARHGEF37      | protein_coding |
| ENSG00000184845 | DRD1          | protein_coding |
| ENSG00000185924 | RTN4RL1       | protein_coding |
| ENSG00000186635 | ARAP1         | protein_coding |
| ENSG00000186834 | HEXIM1        | protein_coding |
| ENSG00000187535 | IFT140        | protein_coding |
| ENSG00000187609 | EXD3          | protein_coding |
| ENSG00000187626 | ZKSCAN4       | protein_coding |
| ENSG00000188000 | OR7D2         | protein_coding |
| ENSG00000188315 | C3orf62       | protein_coding |
| ENSG00000188687 | SLC4A5        | protein_coding |
| ENSG00000188747 | NOXA1         | protein_coding |
| ENSG00000189227 | C15orf61      | protein_coding |
| ENSG00000196267 | ZNF836        | protein_coding |
| ENSG00000196663 | TECPR2        | protein_coding |
| ENSG00000196700 | ZNF512B       | protein_coding |
| ENSG00000196814 | MVB12B        | protein_coding |
| ENSG00000197681 | TBC1D3        | protein_coding |
| ENSG00000197747 | S100A10       | protein_coding |
| ENSG00000197766 | CFD           | protein_coding |
| ENSG00000197818 | SLC9A8        | protein_coding |
| ENSG00000198590 | C3orf35       | protein_coding |

|                 |                  |                      |
|-----------------|------------------|----------------------|
| ENSG00000198691 | ABCA4            | protein_coding       |
| ENSG00000198728 | LDB1             | protein_coding       |
| ENSG00000198873 | GRK5             | protein_coding       |
| ENSG00000198915 | RASGEF1A         | protein_coding       |
| ENSG00000204628 | GNB2L1           | protein_coding       |
| ENSG00000205090 | TMEM240          | protein_coding       |
| ENSG00000205663 | RP11-706O15.5    | lincRNA              |
| ENSG00000206113 | RP11-503N18.1    | lincRNA              |
| ENSG00000212123 | PRR22            | protein_coding       |
| ENSG00000213380 | COG8             | protein_coding       |
| ENSG00000213553 | RPLP0P6          | pseudogene           |
| ENSG00000213609 | RP11-170M17.2    | pseudogene           |
| ENSG00000213672 | NCKIPSD          | protein_coding       |
| ENSG00000213862 | CTD-2270N23.1    | pseudogene           |
| ENSG00000215190 | LINC00680        | processed_transcript |
| ENSG00000215305 | VPS16            | protein_coding       |
| ENSG00000215790 | SLC35E2          | protein_coding       |
| ENSG00000215910 | C1orf167         | protein_coding       |
| ENSG00000217648 | RP1-95L4.4       | pseudogene           |
| ENSG00000218052 | ADAMTS7P4        | pseudogene           |
| ENSG00000219755 | RP1-199J3.5      | pseudogene           |
| ENSG00000220472 | RP11-69L16.5     | pseudogene           |
| ENSG00000221926 | TRIM16           | protein_coding       |
| ENSG00000222482 | AC005071.1       | miRNA                |
| ENSG00000223855 | AC147651.3       | lincRNA              |
| ENSG00000225051 | HMGB3P22         | pseudogene           |
| ENSG00000225096 | XXbac-BPG55C20.7 | lincRNA              |
| ENSG00000225259 | ST13P6           | pseudogene           |
| ENSG00000225447 | RPS15AP10        | pseudogene           |
| ENSG00000225568 | RP11-384B12.3    | pseudogene           |
| ENSG00000225806 | RP1-309F20.3     | processed_transcript |
| ENSG00000226742 | HSBP1L1          | protein_coding       |
| ENSG00000226920 | RP5-1068B5.3     | lincRNA              |
| ENSG00000227603 | RP11-165J3.6     | antisense            |
| ENSG00000227973 | PIN4P1           | pseudogene           |
| ENSG00000228107 | AP000692.9       | sense_overlapping    |
| ENSG00000228172 | RP1-317E23.3     | antisense            |
| ENSG00000228224 | NACAP1           | pseudogene           |
| ENSG00000228331 | RPL17P43         | pseudogene           |
| ENSG00000228801 | RP11-110G21.1    | antisense            |
| ENSG00000228878 | AC007551.3       | lincRNA              |
| ENSG00000229119 | CTB-63M22.1      | pseudogene           |
| ENSG00000229833 | PET100           | protein_coding       |
| ENSG00000230832 | RP11-325P15.2    | pseudogene           |
| ENSG00000232295 | RP11-154D6.1     | antisense            |
| ENSG00000232385 | RPS3AP25         | pseudogene           |
| ENSG00000232561 | GTF2IP1          | pseudogene           |
| ENSG00000233859 | ADH5P4           | pseudogene           |

|                 |                |                      |
|-----------------|----------------|----------------------|
| ENSG00000234648 | AL162151.3     | pseudogene           |
| ENSG00000235649 | MXRA5P1        | pseudogene           |
| ENSG00000235776 | AC000089.3     | pseudogene           |
| ENSG00000236432 | AC097662.2     | antisense            |
| ENSG00000236735 | RPL31P63       | pseudogene           |
| ENSG00000236976 | RP11-165H4.2   | pseudogene           |
| ENSG00000237214 | RP11-12M9.3    | pseudogene           |
| ENSG00000237991 | RPL35P1        | pseudogene           |
| ENSG00000238082 | AC009948.7     | pseudogene           |
| ENSG00000239704 | CDRT4          | protein_coding       |
| ENSG00000239789 | MRPS17         | protein_coding       |
| ENSG00000242071 | RPL7AP6        | pseudogene           |
| ENSG00000243364 | EFNA4          | protein_coding       |
| ENSG00000243710 | WDR65          | protein_coding       |
| ENSG00000247271 | ZBED5-AS1      | antisense            |
| ENSG00000248309 | MEF2C-AS1      | antisense            |
| ENSG00000249142 | CTD-2290P7.1   | pseudogene           |
| ENSG00000249465 | RBMXP4         | pseudogene           |
| ENSG00000250327 | RP11-173M11.2  | pseudogene           |
| ENSG00000250571 | GLI4           | protein_coding       |
| ENSG00000251085 | RP11-893F2.6   | lincRNA              |
| ENSG00000251485 | AC068134.10    | pseudogene           |
| ENSG00000253392 | AC006277.2     | antisense            |
| ENSG00000254206 | NPIP11         | protein_coding       |
| ENSG00000254409 | RP11-613D13.4  | sense_overlapping    |
| ENSG00000255967 | RP11-438L7.3   | pseudogene           |
| ENSG00000258982 | RP11-638I2.4   | antisense            |
| ENSG00000259088 | CTD-2017C7.2   | antisense            |
| ENSG00000259305 | ZHX1-C8ORF76   | protein_coding       |
| ENSG00000259673 | IQCH-AS1       | lincRNA              |
| ENSG00000259807 | RP11-426C22.4  | lincRNA              |
| ENSG00000260086 | RP11-42I10.1   | lincRNA              |
| ENSG00000260296 | RP11-395I6.3   | sense_overlapping    |
| ENSG00000260461 | RP11-541N10.3  | sense_overlapping    |
| ENSG00000260495 | RP11-55K13.1   | antisense            |
| ENSG00000261126 | RBFADN         | processed_transcript |
| ENSG00000261159 | RP11-723O4.9   | lincRNA              |
| ENSG00000261168 | RP11-68I18.10  | sense_overlapping    |
| ENSG00000263422 | AC005702.1     | miRNA                |
| ENSG00000265458 | RP13-20L14.6   | antisense            |
| ENSG00000266777 | SH3GL1P1       | pseudogene           |
| ENSG00000266876 | RP11-1148O4.1  | pseudogene           |
| ENSG00000266968 | RP11-116O18.1  | sense_intronic       |
| ENSG00000267288 | RP13-890H12.2  | antisense            |
| ENSG00000267317 | CTB-25B13.12   | processed_transcript |
| ENSG00000268856 | AP001579.1     | protein_coding       |
| ENSG00000271151 | RP11-394I13.2  | lincRNA              |
| ENSG00000271912 | RP11-661A12.14 | lincRNA              |



|                 |                |           |
|-----------------|----------------|-----------|
| ENSG00000272017 | RP1-199J3.7    | antisense |
| ENSG00000272112 | CTB-113P19.5   | lincRNA   |
| ENSG00000272692 | RP11-399K21.14 | lincRNA   |
| ENSG00000272842 | RP11-513M16.7  | antisense |
| ENSG00000272950 | RP11-307C18.1  | antisense |
| ENSG00000273230 | RP11-1246C19.1 | lincRNA   |
| ENSG00000273356 | RP11-804H8.6   | lincRNA   |

Supplementary Table S4: GO Analysis\_ Module Skyblue

| GO.category | GO.over_represented_pvalue | GO.numDEInCat | GO.numInCat | GO.term                                                                                      | GO.ontology |
|-------------|----------------------------|---------------|-------------|----------------------------------------------------------------------------------------------|-------------|
| GO:0045773  | 0.000270903                | 4             | 36          | positive regulation of axon extension : BP                                                   | BP          |
| GO:0051179  | 0.000533571                | 55            | 4204        | localization : BP                                                                            | BP          |
| GO:0046471  | 0.000973213                | 3             | 22          | phosphatidylglycerol metabolic process : BP                                                  | BP          |
| GO:0035356  | 0.001192203                | 2             | 6           | cellular triglyceride homeostasis : BP                                                       | BP          |
| GO:0090066  | 0.001217499                | 10            | 352         | regulation of anatomical structure size : BP                                                 | BP          |
| GO:0048102  | 0.001640934                | 2             | 7           | autophagic cell death : BP                                                                   | BP          |
| GO:0036149  | 0.001648499                | 2             | 7           | phosphatidylinositol acyl-chain remodeling : BP                                              | BP          |
| GO:0042149  | 0.00192514                 | 3             | 28          | cellular response to glucose starvation : BP                                                 | BP          |
| GO:0010663  | 0.002093637                | 2             | 8           | positive regulation of striated muscle cell apoptotic process : BP                           | BP          |
| GO:0010666  | 0.002093637                | 2             | 8           | positive regulation of cardiac muscle cell apoptotic process : BP                            | BP          |
| GO:0006810  | 0.002147037                | 44            | 3306        | transport : BP                                                                               | BP          |
| GO:0036148  | 0.002166927                | 2             | 8           | phosphatidylglycerol acyl-chain remodeling : BP                                              | BP          |
| GO:0036150  | 0.002185999                | 2             | 8           | phosphatidylserine acyl-chain remodeling : BP                                                | BP          |
| GO:0050772  | 0.002491372                | 4             | 64          | positive regulation of axonogenesis : BP                                                     | BP          |
| GO:0048588  | 0.002537741                | 6             | 155         | developmental cell growth : BP                                                               | BP          |
| GO:0065008  | 0.003624319                | 34            | 2426        | regulation of biological quality : BP                                                        | BP          |
| GO:0032535  | 0.003671617                | 8             | 281         | regulation of cellular component size : BP                                                   | BP          |
| GO:0048639  | 0.004116446                | 5             | 119         | positive regulation of developmental growth : BP                                             | BP          |
| GO:0009069  | 0.004147781                | 3             | 36          | serine family amino acid metabolic process : BP                                              | BP          |
| GO:0090161  | 0.004198778                | 2             | 11          | Golgi ribbon formation : BP                                                                  | BP          |
| GO:0051234  | 0.004217341                | 44            | 3418        | establishment of localization : BP                                                           | BP          |
| GO:0010508  | 0.004939344                | 4             | 77          | positive regulation of autophagy : BP                                                        | BP          |
| GO:0030516  | 0.005045934                | 4             | 78          | regulation of axon extension : BP                                                            | BP          |
| GO:0010876  | 0.005661346                | 7             | 239         | lipid localization : BP                                                                      | BP          |
| GO:0010506  | 0.005881593                | 7             | 241         | regulation of autophagy : BP                                                                 | BP          |
| GO:0036152  | 0.005921105                | 2             | 13          | phosphatidylethanolamine acyl-chain remodeling : BP                                          | BP          |
| GO:0016239  | 0.006101639                | 3             | 42          | positive regulation of macroautophagy : BP                                                   | BP          |
| GO:0031669  | 0.006199016                | 5             | 130         | cellular response to nutrient levels : BP                                                    | BP          |
| GO:0010661  | 0.00670932                 | 2             | 14          | positive regulation of muscle cell apoptotic process : BP                                    | BP          |
| GO:0097320  | 0.006823593                | 2             | 14          | membrane tubulation : BP                                                                     | BP          |
| GO:0050482  | 0.006829419                | 2             | 14          | arachidonic acid secretion : BP                                                              | BP          |
| GO:1903963  | 0.006829419                | 2             | 14          | arachidonate transport : BP                                                                  | BP          |
| GO:0050770  | 0.006835778                | 5             | 134         | regulation of axonogenesis : BP                                                              | BP          |
| GO:0007033  | 0.007617843                | 6             | 192         | vacuole organization : BP                                                                    | BP          |
| GO:0006516  | 0.007859665                | 2             | 15          | glycoprotein catabolic process : BP                                                          | BP          |
| GO:0061387  | 0.008068352                | 4             | 89          | regulation of extent of cell growth : BP                                                     | BP          |
| GO:0046470  | 0.008205371                | 3             | 46          | phosphatidylcholine metabolic process : BP                                                   | BP          |
| GO:0038044  | 0.008216246                | 1             | 1           | transforming growth factor-beta secretion : BP                                               | BP          |
| GO:1904235  | 0.008216246                | 1             | 1           | regulation of substrate-dependent cell migration, cell attachment to substrate : BP          | BP          |
| GO:1904237  | 0.008216246                | 1             | 1           | positive regulation of substrate-dependent cell migration, cell attachment to substrate : BP | BP          |
| GO:2001201  | 0.008216246                | 1             | 1           | regulation of transforming growth factor-beta secretion : BP                                 | BP          |
| GO:2001202  | 0.008216246                | 1             | 1           | negative regulation of transforming growth factor-beta secretion : BP                        | BP          |
| GO:0044710  | 0.008255634                | 39            | 3029        | single-organism metabolic process : BP                                                       | BP          |
| GO:0007040  | 0.008440933                | 3             | 47          | lysosome organization : BP                                                                   | BP          |
| GO:0080171  | 0.008440933                | 3             | 47          | lytic vacuole organization : BP                                                              | BP          |
| GO:1902618  | 0.008675447                | 1             | 1           | cellular response to fluoride : BP                                                           | BP          |
| GO:0006914  | 0.008750361                | 9             | 393         | autophagy : BP                                                                               | BP          |
| GO:1902203  | 0.008818628                | 1             | 1           | negative regulation of hepatocyte growth factor receptor signaling pathway : BP              | BP          |
| GO:2001112  | 0.008818628                | 1             | 1           | regulation of cellular response to hepatocyte growth factor stimulus : BP                    | BP          |
| GO:2001113  | 0.008818628                | 1             | 1           | negative regulation of cellular response to hepatocyte growth factor stimulus : BP           | BP          |
| GO:0036296  | 0.008840101                | 2             | 16          | response to increased oxygen levels : BP                                                     | BP          |
| GO:0055093  | 0.008840101                | 2             | 16          | response to hyperoxia : BP                                                                   | BP          |
| GO:0036151  | 0.008918668                | 2             | 16          | phosphatidylcholine acyl-chain remodeling : BP                                               | BP          |
| GO:1903778  | 0.008983064                | 1             | 1           | protein localization to vacuolar membrane : BP                                               | BP          |
| GO:0002514  | 0.009016431                | 1             | 1           | B cell tolerance induction : BP                                                              | BP          |
| GO:0002649  | 0.009016431                | 1             | 1           | regulation of tolerance induction to self antigen : BP                                       | BP          |
| GO:0002651  | 0.009016431                | 1             | 1           | positive regulation of tolerance induction to self antigen : BP                              | BP          |
| GO:0002661  | 0.009016431                | 1             | 1           | regulation of B cell tolerance induction : BP                                                | BP          |
| GO:0002663  | 0.009016431                | 1             | 1           | positive regulation of B cell tolerance induction : BP                                       | BP          |
| GO:0042883  | 0.009024842                | 1             | 1           | cysteine transport : BP                                                                      | BP          |
| GO:1903712  | 0.009024842                | 1             | 1           | cysteine transmembrane transport : BP                                                        | BP          |
| GO:0002152  | 0.009042873                | 1             | 1           | bile acid conjugation : BP                                                                   | BP          |
| GO:0070165  | 0.009051179                | 1             | 1           | positive regulation of adiponectin secretion : BP                                            | BP          |
| GO:0045081  | 0.009065586                | 1             | 1           | negative regulation of interleukin-10 biosynthetic process : BP                              | BP          |
| GO:0061580  | 0.00906907                 | 1             | 1           | colon epithelial cell migration : BP                                                         | BP          |
| GO:0070981  | 0.009069247                | 1             | 1           | L-asparagine biosynthetic process : BP                                                       | BP          |
| GO:0070982  | 0.009069247                | 1             | 1           | L-asparagine metabolic process : BP                                                          | BP          |
| GO:0009267  | 0.00933495                 | 4             | 92          | cellular response to starvation : BP                                                         | BP          |
| GO:0003148  | 0.009791134                | 2             | 17          | outflow tract septum morphogenesis : BP                                                      | BP          |
| GO:0060351  | 0.009947398                | 2             | 17          | cartilage development involved in endochondral bone morphogenesis : BP                       | BP          |

GO Analysis\_ Module Floralwhite

| GO.category | GO.over_represented_pvalue | GO.numDEInCat | GO.numInCat | GO.term                                                                        | GO.ontology |
|-------------|----------------------------|---------------|-------------|--------------------------------------------------------------------------------|-------------|
| GO:0048167  | 4.9909E-05                 | 5             | 100         | regulation of synaptic plasticity : BP                                         | BP          |
| GO:0007610  | 8.84588E-05                | 8             | 358         | behavior : BP                                                                  | BP          |
| GO:0060291  | 0.000437358                | 3             | 37          | long-term synaptic potentiation : BP                                           | BP          |
| GO:0007268  | 0.00056616                 | 7             | 359         | chemical synaptic transmission : BP                                            | BP          |
| GO:0098916  | 0.00056616                 | 7             | 359         | anterograde trans-synaptic signaling : BP                                      | BP          |
| GO:0099536  | 0.00056616                 | 7             | 359         | synaptic signaling : BP                                                        | BP          |
| GO:0099537  | 0.00056616                 | 7             | 359         | trans-synaptic signalling : BP                                                 | BP          |
| GO:0044708  | 0.000634082                | 6             | 262         | single-organism behavior : BP                                                  | BP          |
| GO:1903035  | 0.000708776                | 3             | 43          | negative regulation of response to wounding : BP                               | BP          |
| GO:0050804  | 0.00095456                 | 5             | 188         | modulation of synaptic transmission : BP                                       | BP          |
| GO:0045956  | 0.001026562                | 2             | 12          | positive regulation of calcium ion-dependent exocytosis : BP                   | BP          |
| GO:0010664  | 0.001269142                | 2             | 13          | negative regulation of striated muscle cell apoptotic process : BP             | BP          |
| GO:1990138  | 0.001305626                | 4             | 120         | neuron projection extension : BP                                               | BP          |
| GO:0055094  | 0.001721165                | 2             | 15          | response to lipoprotein particle : BP                                          | BP          |
| GO:0032101  | 0.002021399                | 7             | 441         | regulation of response to external stimulus : BP                               | BP          |
| GO:0009416  | 0.002079514                | 5             | 222         | response to light stimulus : BP                                                | BP          |
| GO:0060292  | 0.002099277                | 2             | 17          | long term synaptic depression : BP                                             | BP          |
| GO:0021952  | 0.0022985                  | 2             | 18          | central nervous system projection neuron axonogenesis : BP                     | BP          |
| GO:0051259  | 0.00235734                 | 6             | 334         | protein oligomerization : BP                                                   | BP          |
| GO:0048710  | 0.002364306                | 2             | 18          | regulation of astrocyte differentiation : BP                                   | BP          |
| GO:0051932  | 0.002590544                | 2             | 19          | synaptic transmission, GABAergic : BP                                          | BP          |
| GO:0010665  | 0.00265932                 | 2             | 19          | regulation of cardiac muscle cell apoptotic process : BP                       | BP          |
| GO:0010656  | 0.002686947                | 2             | 19          | negative regulation of muscle cell apoptotic process : BP                      | BP          |
| GO:0010662  | 0.002955298                | 2             | 20          | regulation of striated muscle cell apoptotic process : BP                      | BP          |
| GO:0007616  | 0.003140352                | 2             | 21          | long-term memory : BP                                                          | BP          |
| GO:0050709  | 0.0031634                  | 3             | 72          | negative regulation of protein secretion : BP                                  | BP          |
| GO:0048588  | 0.003374084                | 4             | 155         | developmental cell growth : BP                                                 | BP          |
| GO:0006295  | 0.003392329                | 2             | 21          | nucleotide-excision repair, DNA incision, 3'-to lesion : BP                    | BP          |
| GO:0007270  | 0.003409453                | 3             | 75          | neuron-neuron synaptic transmission : BP                                       | BP          |
| GO:0008045  | 0.003456337                | 2             | 22          | motor neuron axon guidance : BP                                                | BP          |
| GO:0050806  | 0.003536942                | 3             | 76          | positive regulation of synaptic transmission : BP                              | BP          |
| GO:0008299  | 0.0037274                  | 2             | 22          | isoprenoid biosynthetic process : BP                                           | BP          |
| GO:0021955  | 0.003742114                | 2             | 23          | central nervous system neuron axonogenesis : BP                                | BP          |
| GO:0039520  | 0.003843408                | 1             | 1           | induction by virus of host autophagy : BP                                      | BP          |
| GO:0010659  | 0.003892092                | 2             | 23          | cardiac muscle cell apoptotic process : BP                                     | BP          |
| GO:0009645  | 0.004016651                | 1             | 1           | response to low light intensity stimulus : BP                                  | BP          |
| GO:0046690  | 0.004016651                | 1             | 1           | response to tellurium ion : BP                                                 | BP          |
| GO:0021793  | 0.004061413                | 1             | 1           | chemorepulsion of branchiomotor axon : BP                                      | BP          |
| GO:0015755  | 0.004129487                | 1             | 1           | fructose transport : BP                                                        | BP          |
| GO:0032445  | 0.004129487                | 1             | 1           | fructose import : BP                                                           | BP          |
| GO:0097319  | 0.004129487                | 1             | 1           | carbohydrate import into cell : BP                                             | BP          |
| GO:0098704  | 0.004129487                | 1             | 1           | carbohydrate import across plasma membrane : BP                                | BP          |
| GO:1990539  | 0.004129487                | 1             | 1           | fructose import across plasma membrane : BP                                    | BP          |
| GO:0042628  | 0.004161096                | 1             | 1           | mating plug formation : BP                                                     | BP          |
| GO:0044704  | 0.004161096                | 1             | 1           | single-organism reproductive behavior : BP                                     | BP          |
| GO:0045297  | 0.004161096                | 1             | 1           | post-mating behavior : BP                                                      | BP          |
| GO:0061108  | 0.004161096                | 1             | 1           | seminal vesicle epithelium development : BP                                    | BP          |
| GO:0036046  | 0.004173478                | 1             | 1           | protein demalonylation : BP                                                    | BP          |
| GO:0036047  | 0.004173478                | 1             | 1           | peptidyl-lysine demalonylation : BP                                            | BP          |
| GO:0036048  | 0.004173478                | 1             | 1           | protein desuccinylation : BP                                                   | BP          |
| GO:0036049  | 0.004173478                | 1             | 1           | peptidyl-lysine desuccinylation : BP                                           | BP          |
| GO:0061698  | 0.004173478                | 1             | 1           | protein deglutarylation : BP                                                   | BP          |
| GO:0061699  | 0.004173478                | 1             | 1           | peptidyl-lysine deglutarylation : BP                                           | BP          |
| GO:0010658  | 0.004244718                | 2             | 24          | striated muscle cell apoptotic process : BP                                    | BP          |
| GO:1905099  | 0.004386961                | 1             | 1           | positive regulation of guanyl-nucleotide exchange factor activity : BP         | BP          |
| GO:2001108  | 0.004386961                | 1             | 1           | positive regulation of Rho guanyl-nucleotide exchange factor activity : BP     | BP          |
| GO:0072659  | 0.004445717                | 4             | 165         | protein localization to plasma membrane : BP                                   | BP          |
| GO:0071444  | 0.004453429                | 1             | 1           | cellular response to pheromone : BP                                            | BP          |
| GO:0060560  | 0.004753765                | 4             | 171         | developmental growth involved in morphogenesis : BP                            | BP          |
| GO:0032102  | 0.004963298                | 4             | 169         | negative regulation of response to external stimulus : BP                      | BP          |
| GO:0016049  | 0.005000554                | 6             | 393         | cell growth : BP                                                               | BP          |
| GO:0071326  | 0.005189427                | 3             | 86          | cellular response to monosaccharide stimulus : BP                              | BP          |
| GO:0071331  | 0.005189427                | 3             | 86          | cellular response to hexose stimulus : BP                                      | BP          |
| GO:0048812  | 0.00566515                 | 6             | 409         | neuron projection morphogenesis : BP                                           | BP          |
| GO:1990778  | 0.005734383                | 4             | 177         | protein localization to cell periphery : BP                                    | BP          |
| GO:0046676  | 0.005734885                | 2             | 28          | negative regulation of insulin secretion : BP                                  | BP          |
| GO:0061098  | 0.005736012                | 2             | 28          | positive regulation of protein tyrosine kinase activity : BP                   | BP          |
| GO:1903307  | 0.005819606                | 2             | 28          | positive regulation of regulated secretory pathway : BP                        | BP          |
| GO:1902803  | 0.00583932                 | 2             | 28          | regulation of synaptic vesicle transport : BP                                  | BP          |
| GO:0048841  | 0.00606868                 | 2             | 30          | regulation of axon extension involved in axon guidance : BP                    | BP          |
| GO:0031667  | 0.006093592                | 5             | 285         | response to nutrient levels : BP                                               | BP          |
| GO:0090278  | 0.006162074                | 2             | 29          | negative regulation of peptide hormone secretion : BP                          | BP          |
| GO:0071322  | 0.006271035                | 3             | 92          | cellular response to carbohydrate stimulus : BP                                | BP          |
| GO:0051241  | 0.006458135                | 8             | 690         | negative regulation of multicellular organismal process : BP                   | BP          |
| GO:1902667  | 0.006469567                | 2             | 31          | regulation of axon guidance : BP                                               | BP          |
| GO:0002792  | 0.006604922                | 2             | 30          | negative regulation of peptide secretion : BP                                  | BP          |
| GO:0051262  | 0.007028151                | 3             | 95          | protein tetramerization : BP                                                   | BP          |
| GO:0050919  | 0.007187646                | 2             | 32          | negative chemotaxis : BP                                                       | BP          |
| GO:0050830  | 0.007425082                | 2             | 31          | defense response to Gram-positive bacterium : BP                               | BP          |
| GO:0051650  | 0.00746725                 | 4             | 191         | establishment of vesicle localization : BP                                     | BP          |
| GO:0071526  | 0.00758786                 | 2             | 33          | semaphorin-plexin signaling pathway : BP                                       | BP          |
| GO:0051961  | 0.007642944                | 4             | 193         | negative regulation of nervous system development : BP                         | BP          |
| GO:1903034  | 0.007710661                | 3             | 99          | regulation of response to wounding : BP                                        | BP          |
| GO:0048846  | 0.007758898                | 2             | 34          | axon extension involved in axon guidance : BP                                  | BP          |
| GO:1902284  | 0.007758898                | 2             | 34          | neuron projection extension involved in neuron projection guidance : BP        | BP          |
| GO:1900454  | 0.007777389                | 1             | 2           | positive regulation of long term synaptic depression : BP                      | BP          |
| GO:0060733  | 0.007821373                | 1             | 2           | regulation of eIF2 alpha phosphorylation by amino acid starvation : BP         | BP          |
| GO:0071262  | 0.007821373                | 1             | 2           | regulation of translational initiation in response to starvation : BP          | BP          |
| GO:0071264  | 0.007821373                | 1             | 2           | positive regulation of translational initiation in response to starvation : BP | BP          |
| GO:0045908  | 0.007997016                | 1             | 2           | negative regulation of vasodilation : BP                                       | BP          |
| GO:0032229  | 0.008046974                | 1             | 2           | negative regulation of synaptic transmission, GABAergic : BP                   | BP          |
| GO:0039519  | 0.00819693                 | 1             | 2           | modulation by virus of host autophagy : BP                                     | BP          |
| GO:0007412  | 0.008269098                | 1             | 2           | axon target recognition : BP                                                   | BP          |
| GO:0061107  | 0.008271037                | 1             | 2           | seminal vesicle development : BP                                               | BP          |
| GO:0021644  | 0.008275038                | 1             | 2           | vagus nerve morphogenesis : BP                                                 | BP          |
| GO:0031630  | 0.008281182                | 1             | 2           | regulation of synaptic vesicle fusion to presynaptic membrane : BP             | BP          |
| GO:0097156  | 0.008321807                | 1             | 2           | fasciculation of motor neuron axon : BP                                        | BP          |
| GO:0055099  | 0.00835166                 | 1             | 2           | response to high density lipoprotein particle : BP                             | BP          |
| GO:0047496  | 0.008360167                | 2             | 34          | vesicle transport along microtubule : BP                                       | BP          |
| GO:0021784  | 0.00839696                 | 1             | 2           | postganglionic parasympathetic fiber development : BP                          | BP          |
| GO:0010660  | 0.008428257                | 2             | 34          | regulation of muscle cell apoptotic process : BP                               | BP          |
| GO:0006904  | 0.008486159                | 2             | 34          | vesicle docking involved in exocytosis : BP                                    | BP          |
| GO:2001106  | 0.008531384                | 1             | 2           | regulation of Rho guanyl-nucleotide exchange factor activity : BP              | BP          |
| GO:0009991  | 0.008611824                | 5             | 310         | response to extracellular stimulus : BP                                        | BP          |
| GO:0051648  | 0.008890114                | 4             | 201         | vesicle localization : BP                                                      | BP          |
| GO:0016233  | 0.009392664                | 2             | 36          | telomere capping : BP                                                          | BP          |
| GO:0045685  | 0.009727248                | 2             | 37          | regulation of glial cell differentiation : BP                                  | BP          |
| GO:1903531  | 0.009773705                | 3             | 108         | negative regulation of secretion by cell : BP                                  | BP          |
| GO:0032874  | 0.009812933                | 3             | 109         | positive regulation of stress-activated MAPK cascade : BP                      | BP          |
| GO:0061045  | 0.009891093                | 2             | 37          | negative regulation of wound healing : BP                                      | BP          |

**GO Analysis\_ Module Lightcyan**

| GO.category | GO.over_represented_pvalue | GO.numDEInCat | GO.numInCat | GO.term                                                                            | GO.ontology |
|-------------|----------------------------|---------------|-------------|------------------------------------------------------------------------------------|-------------|
| GO:2000543  | 0.001194491                | 2             | 4           | positive regulation of gastrulation : BP                                           | BP          |
| GO:0050907  | 0.001195026                | 3             | 14          | detection of chemical stimulus involved in sensory perception : BP                 | BP          |
| GO:0007606  | 0.002488361                | 4             | 38          | sensory perception of chemical stimulus : BP                                       | BP          |
| GO:0046889  | 0.004418634                | 4             | 44          | positive regulation of lipid biosynthetic process : BP                             | BP          |
| GO:0021694  | 0.004533287                | 2             | 8           | cerebellar Purkinje cell layer formation : BP                                      | BP          |
| GO:0021702  | 0.004533287                | 2             | 8           | cerebellar Purkinje cell differentiation : BP                                      | BP          |
| GO:0033555  | 0.004596875                | 4             | 46          | multicellular organismal response to stress : BP                                   | BP          |
| GO:0006833  | 0.004777049                | 2             | 7           | water transport : BP                                                               | BP          |
| GO:0048266  | 0.005252874                | 2             | 8           | behavioral response to pain : BP                                                   | BP          |
| GO:0031338  | 0.005714037                | 4             | 48          | regulation of vesicle fusion : BP                                                  | BP          |
| GO:0042159  | 0.005860528                | 2             | 8           | lipoprotein catabolic process : BP                                                 | BP          |
| GO:0001580  | 0.006697547                | 2             | 8           | detection of chemical stimulus involved in sensory perception of bitter taste : BP | BP          |
| GO:0015837  | 0.00728313                 | 3             | 26          | amine transport : BP                                                               | BP          |
| GO:0051952  | 0.00728313                 | 3             | 26          | regulation of amine transport : BP                                                 | BP          |
| GO:0007186  | 0.007978361                | 13            | 404         | G-protein coupled receptor signaling pathway : BP                                  | BP          |
| GO:1901642  | 0.008034575                | 2             | 9           | nucleoside transmembrane transport : BP                                            | BP          |
| GO:0050912  | 0.008484177                | 2             | 9           | detection of chemical stimulus involved in sensory perception of taste : BP        | BP          |
| GO:0021692  | 0.008913384                | 2             | 11          | cerebellar Purkinje cell layer morphogenesis : BP                                  | BP          |

# Module-trait relationships

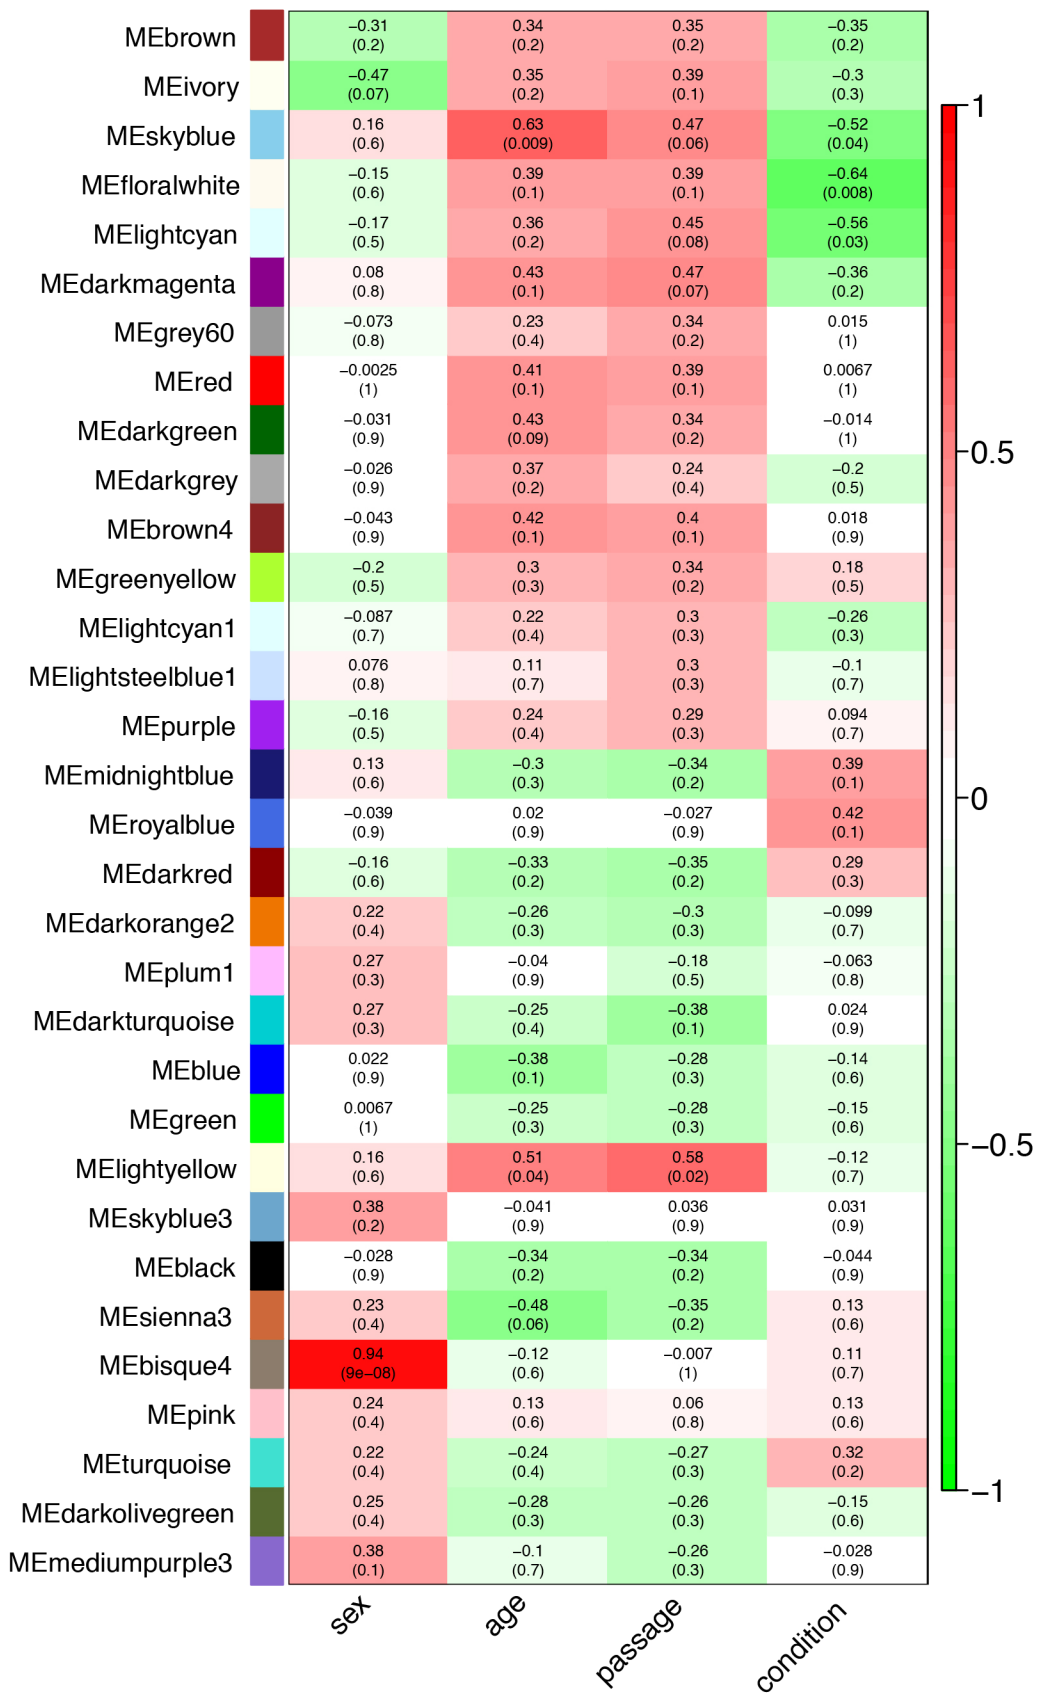

Supplementary Figure S1: Co-expression networks heatmap identified by WGCNA. Each module assigned to a certain color on the left. All considered traits mentioned below the heatmap. Side legend: values of co-expression module for each sex, age, passage and condition trait. P-values are listed in parenthesis below the expression value for each module-trait combination.
